# Supplementary material for: Solution-processed, inverted organic solar cells with bilayered inorganic/organic electron extraction layers
Source: Royal Society of Chemistry journal article supplement (doi:10.1039/c5ra27077d), 2016-01-01
Supplement: c5ra27077d1.pdf [file c5ra27077d1.pdf]

## Supporting Information for:

### Solution-processed, inverted organic solar cells with bilayered inorganic/organic electron extraction layers

Jung Suk Lee,<sup>a</sup> Myoung Joo Cha,<sup>a</sup> Yu Jung Park,<sup>a</sup> Jin Young Kim,<sup>b,\*</sup> Jung Hwa Seo,<sup>a,\*</sup> and Bright Walker<sup>b,\*</sup>

<sup>a</sup>Department of Materials Physics, Dong-A University, 49201, Republic of Korea

<sup>b</sup>School of Energy and Chemical Engineering, Ulsan National Institute of Science and Technology, Ulsan 44610, Republic of Korea

#### 1. X-ray Photoelectron Spectra (XPS)

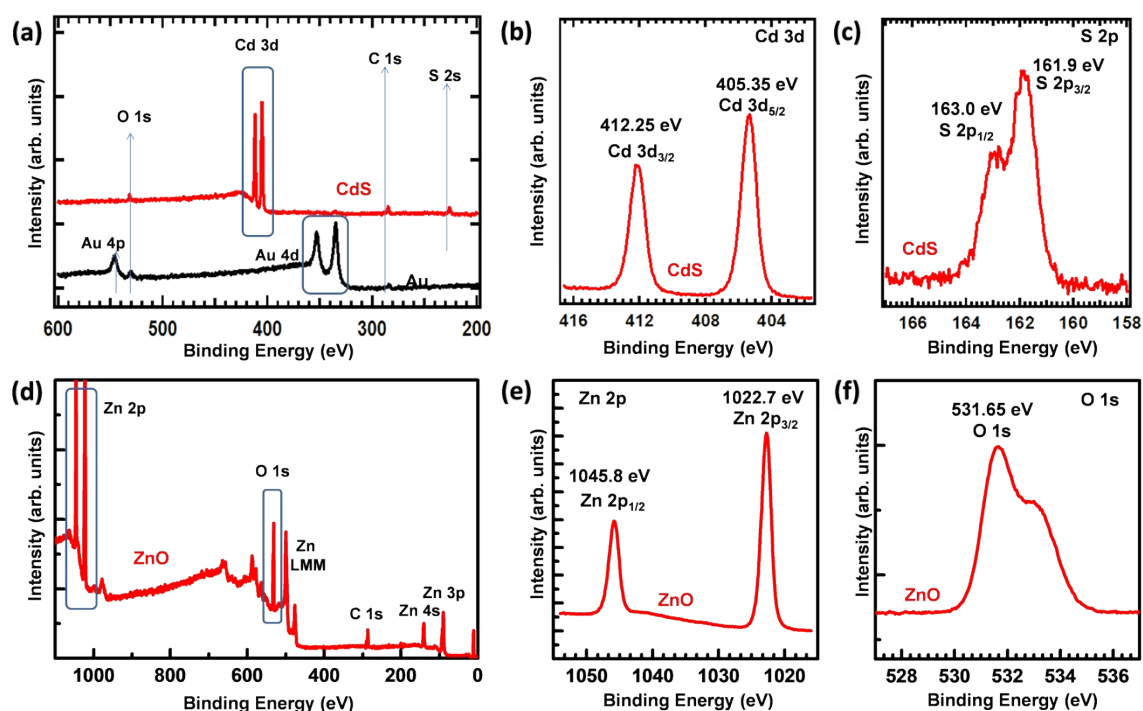

**Figure S1.** X-ray photoelectron spectra for CdS (a-c) and ZnO films (e-f) prepared using the same conditions as in PV devices. Figures (a,d) show surveys, while (b, c, e, f) show close-ups of the Cd 3d, S2p, Zn 2p and O 1s regions, respectively.

## 2. X-ray Diffraction Patterns (XRD)

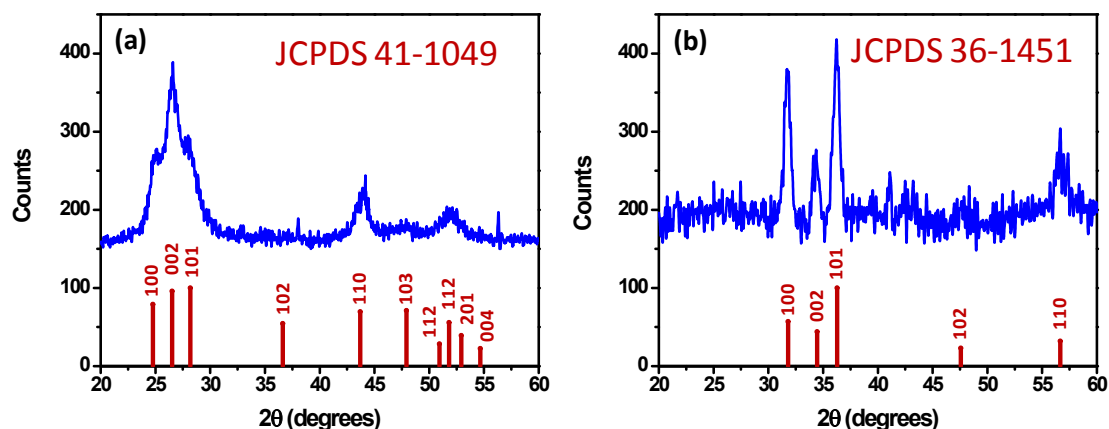

**Figure S2.** X-ray diffraction patterns for (a) CdS and (b) ZnO films prepared using the same conditions as in PV devices.

## 3. Water contact angle measurements

To examine the effect of surface energy on the device properties, water contact angle ( $\theta$ ) measurements were carried out using water droplets on ITO substrates and images were collected with a digital camera. As shown in Fig. S1a, The ITO substrate surface ( $\theta \approx 37^\circ$ ) was hydrophilic. In contrast, the surfaces with interfacial layers showed increased hydrophobicity ( $\theta > 37^\circ$ ) compared to the pristine ITO surface. The CPE layer showed only a slight increase in contact angle ( $38^\circ$ ), indicating that thin CPE layer only slightly increases the hydrophobicity. The ZnO also exhibited only a slight increase in contact angle to  $39^\circ$ , indicating that ZnO surface is only slightly less polar than ITO. In contrast, the CdS layer showed a significantly higher contact angle of  $57^\circ$ , which is consistent with the lower electronegativity of S compared to O and the more covalent nature of the CdS solid. Interestingly, the contact angle of the ZnO increased dramatically upon deposition onto the ZnO film to  $49^\circ$ . This indicates that the CPE self-assembles onto the ZnO film to yield a more hydrophobic surface, suggesting that the ionic functionalities of the CPE align with the polar ZnO surface, while the non-polar polymer backbones are exposed at the top surface. The CdS/CPE film similarly showed an increase in hydrophobicity to  $69^\circ$ , also indicating that the CPE interacts with the CdS film to increase the hydrophobicity of the surface.

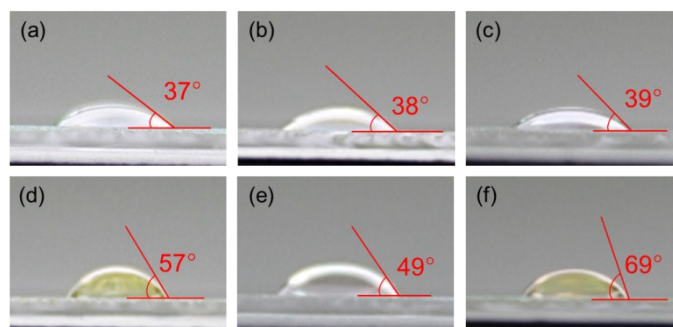

**Fig. S3** Photos of water droplets on the surfaces of (a) ITO, (b) CPE, (c) ZnO, (d) CdS, (e) ZnO/CPE and (f) CdS/CPE substrate.
